# Supplementary material
Source: PubMed Central journal article supplement (PMC2838610)
Supplement: NIHMS166084-supplement-supp_info.pdf [file NIHMS166084-supplement-supp_info.pdf]

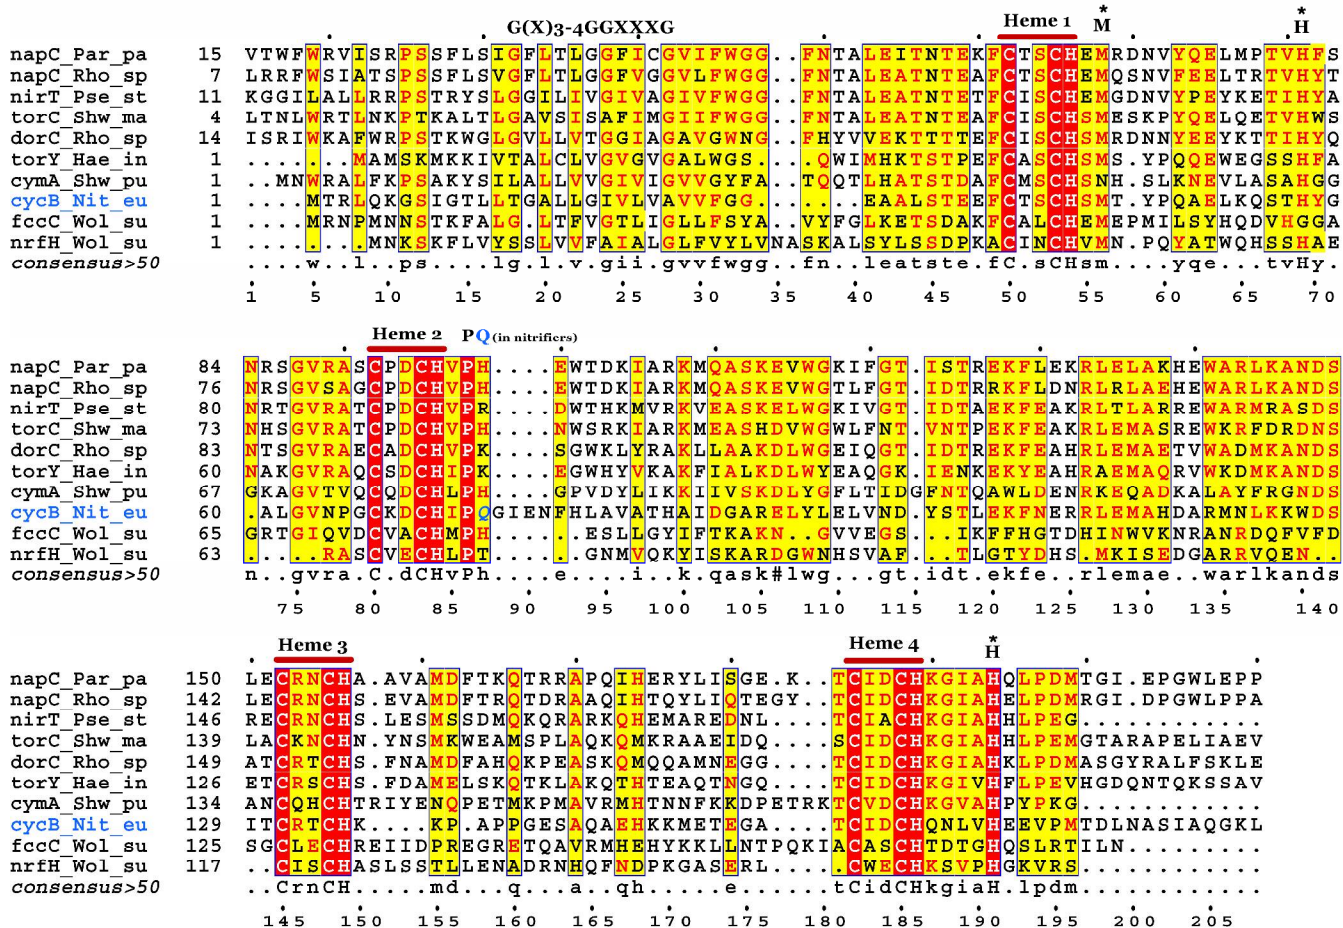

**Figure S1.** Clustal-W multiple sequence alignment and ESPrnt (Easy Sequencing in PostScript) visualization analysis of representative members of the NapC/NirT/TorC family of cytochromes including CycB (*c<sub>m552</sub>*) from *N. europaea* highlighted in blue. White letter, red box designates strict identity; Red character designates similarity in a group; Yellow box designates similarity across groups. Bold letters above the alignment are highly/strictly conserved residues of particular interest (see text). Asterisk indicate possible distal axial ligand to the Fe heme as predicted in other studies (refs 16-22).
